# Supplementary material for: Pain Prevalence and Satisfaction with Pain Management in Inpatients: A Cross-Sectional Study
Source: MDPI journal article supplement (doi:10.3390/healthcare11243191), 2023-12-18
Supplement: s1 [file s1]

## **Pain prevalence in hospitalized patients and satisfaction regarding pain management**

Questionnaire - NCT04901650 (English translation)

Age: \_\_\_\_ years old

Gender:

- ☐ Male
- ☐ Female

Marital Status:

- ☐ Single
- ☐ In a relationship/Married
- ☐ Divorced/Widowed

Race:

- ☐ Caucasian
- ☐ Ethiopian
- ☐ Asian

Religion:

- ☐ Atheist
- ☐ Christian
- ☐ Muslim
- ☐ Protestant
- ☐ Others

Occupation:

- ☐ Employed
- ☐ Retired
- ☐ Housework
- ☐ Unemployed

Comorbidities: \_\_\_\_\_

\_\_\_\_\_

\_\_\_\_\_

\_\_\_\_\_

\_\_\_\_\_

\_\_\_\_\_

\_\_\_\_\_

Service in charge of patient care:

- ☐ Surgical
- ☐ Non-Surgical

Type of hospital admission:

- ☐ Emergent
- ☐ Scheduled

Length of hospital stay: \_\_\_\_\_ days

Do you currently experience any type of pain?

- ☐ Yes
- ☐ No

Indicate the intensity of your current pain:

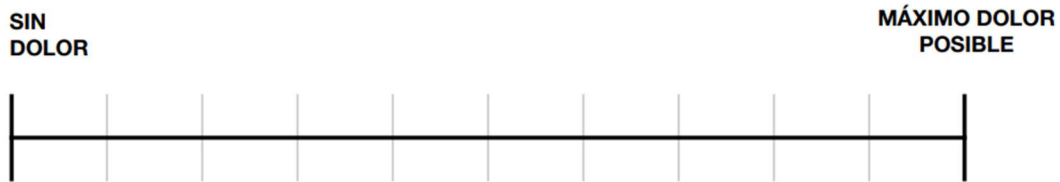

Please mark on the diagram below the area of the body where your pain is located. If you have more than one area of pain, mark the area where pain is of greatest intensity:

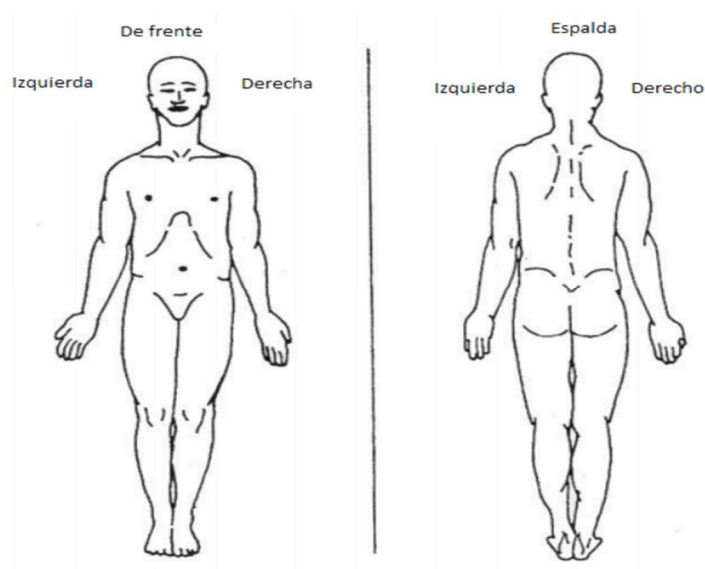

Please indicate from 0 to 10 how satisfied you are with the hospital's pain management

(0 = not satisfied, 10 = maximum satisfaction)

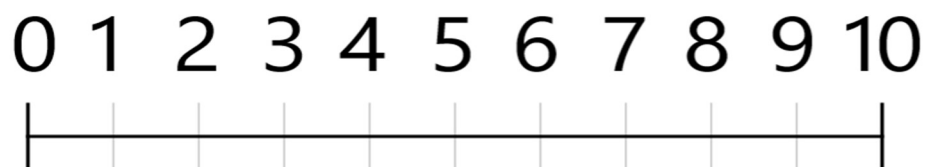

Compared with pain experienced prior to hospital admission, the pain you suffer has:

- ☐ Decreased
- ☐ Not changed
- ☐ Worsened

Treatment for pain in electronic medical records:

- ☐ Yes: \_\_\_\_\_
- ☐ No
